# Supplementary material for: Glucose-Responsive Gene Delivery at Physiological pH through Tertiary-Amine Stabilized Boronate-PVA Particles Synthesized by One-Pot Reaction
Source: MDPI journal article supplement (doi:10.3390/pharmaceutics13010062), 2021-01-06
Supplement: s1 [file s1]

# Supplementary Materials: Glucose-Responsive Gene Delivery at Physiological pH through Tertiary-Amine Stabilized Boronate-PVA Particles Synthesized by One-Pot Reaction

Mangesh Morey, Akshay Srivastava and Abhay Pandit

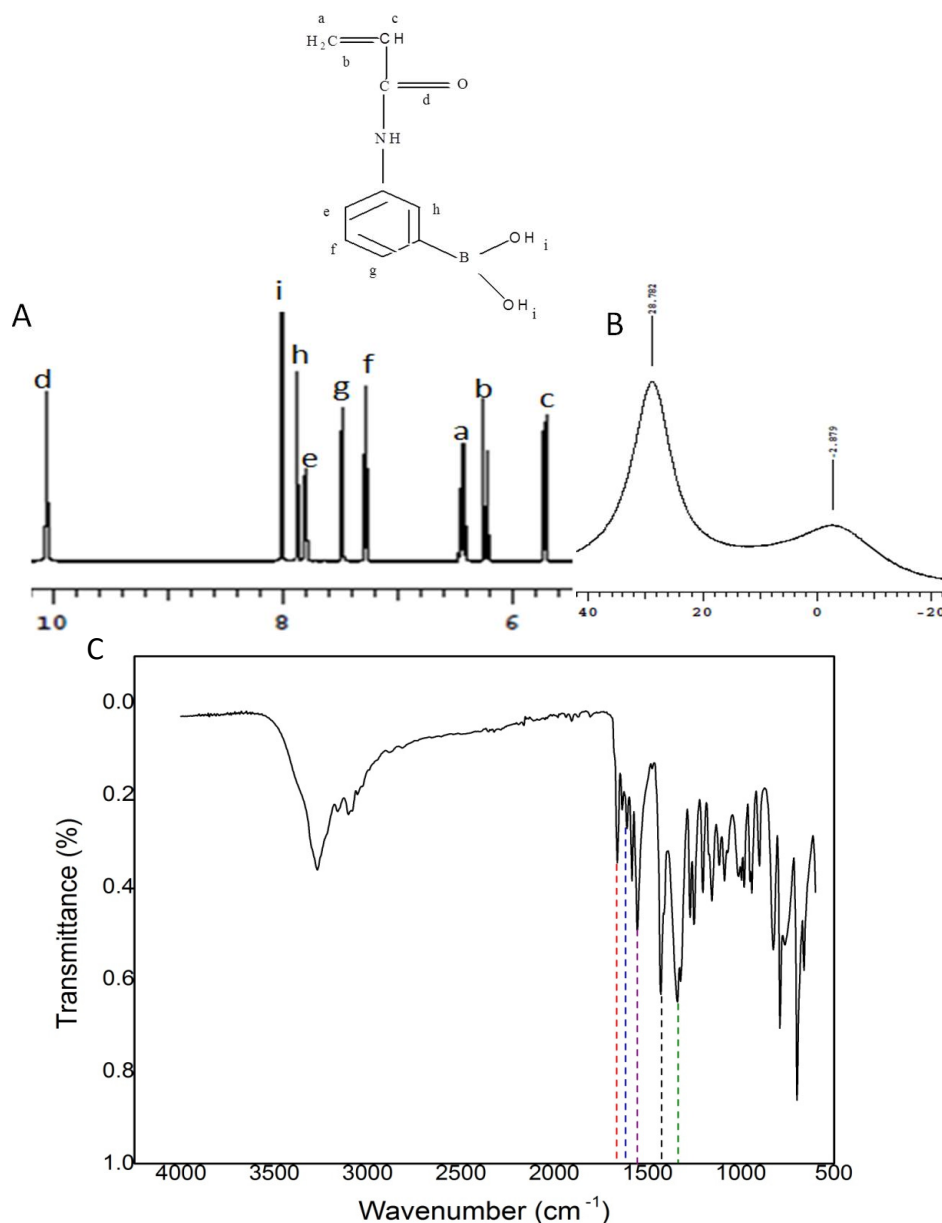

**Figure S1.** Confirmation of AAPBA synthesis by NMR, FTIR analysis (A) <sup>1</sup>H NMR (B) <sup>11</sup>B NMR (C) FTIR C=O;  $\delta=1666$  cm<sup>-1</sup>, C=C  $\delta=1636$  cm<sup>-1</sup>, Amide II;  $\delta=1557$  cm<sup>-1</sup>, benzene;  $\delta=1433$  cm<sup>-1</sup>, -B(OH)<sub>2</sub>;  $\delta=1356$  cm<sup>-1</sup>.
